# Supplementary material
Source: PubMed Central journal article supplement (PMC3536820)
Supplement: NIHMS427097-supplement-1_si_001.pdf [file NIHMS427097-supplement-1_si_001.pdf]

## **Supporting Information**

### **Electrothermal Supercharging in Mass Spectrometry and Tandem Mass Spectrometry of Native Proteins**

Catherine A. Cassou, Harry J. Sterling, Anna C. Susa, and Evan R. Williams<sup>†\*</sup>

Department of Chemistry, University of California, Berkeley, California 94720-1460

\*Address reprint requests to Prof. Evan R. Williams:

Department of Chemistry  
University of California, Berkeley  
B42 Hildebrand Hall  
Berkeley, CA 94720  
Phone: (510) 643-7161  
FAX: (510) 642-7714  
e-mail: erw@berkeley.edu

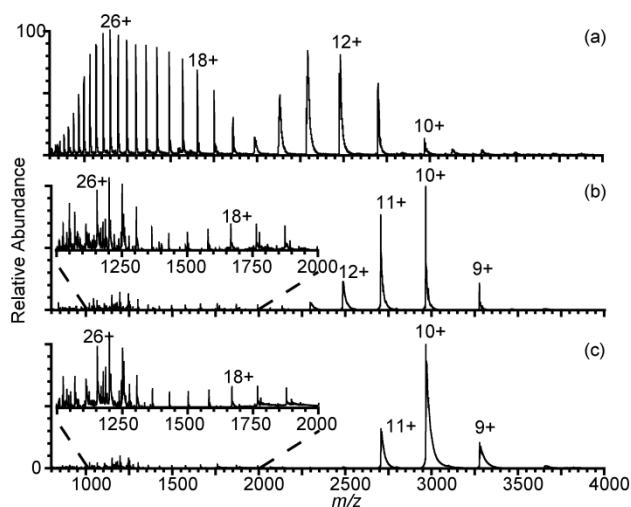

**Figure S-1.** Positive ion nano-electrospray mass spectra of 10  $\mu\text{M}$  EF<sub>N</sub> (30 kDa) in 100 mM ammonium bicarbonate, pH 7, (a) obtained using a Thermo LTQ<sup>TM</sup> mass spectrometer at +0.7 kV spray potential, and (b) using a Waters Q-TOF mass spectrometer. (c) Mass spectrum of 10  $\mu\text{M}$  EF<sub>N</sub> in 100 mM ammonium acetate, pH 7, obtained using a Waters Q-TOF mass spectrometer. Insets in (b) and (c) show that even under the less activating conditions used with the Q-TOF instrument, some high charge states of EF<sub>N</sub> are present, an indication of a population of unfolded structures in solution.

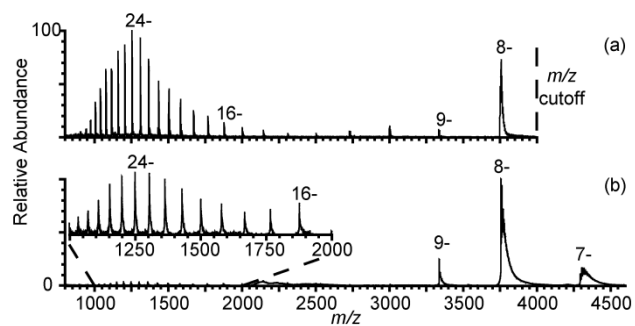

**Figure S-2.** Negative ion nano-electrospray mass spectra of 10  $\mu\text{M}$   $\text{EF}_\text{N}$  (30 kDa) in 100 mM ammonium bicarbonate, pH 7, obtained using (a) a Thermo LTQ<sup>TM</sup> mass spectrometer at -0.7 kV spray potential, and (b) using a Waters Q-TOF mass spectrometer. The inset shows a population of unfolded conformers of  $\text{EF}_\text{N}$  formed even under optimized soft source conditions.

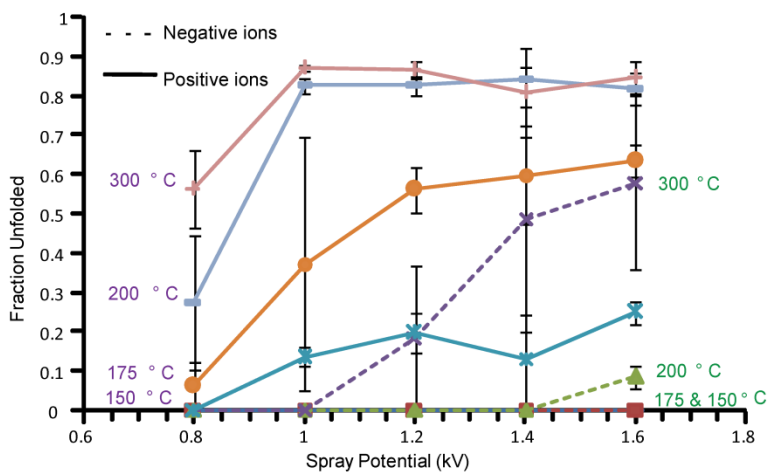

**Figure S-3.** The population of unfolded ions of cytochrome *c* produced from a 100 mM ammonium bicarbonate, pH 7, solution calculated by assigning the 9 – 6+ and 6 – 4- charge states as “folded” conformers and all other charge states as “unfolded” conformers. More electrothermal supercharging occurs for positive ions than for negative ions for a given heated inlet capillary temperature and spray potential.
